# Supplementary material for: In situ laser-assisted synthesis of MoS2 anchored on 3D porous graphene foam for enhanced alkaline hydrogen generation
Source: Royal Society of Chemistry journal article supplement (doi:10.1039/d4cy00213j), 2024-01-01
Supplement: d4cy00213j1.pdf [file d4cy00213j1.pdf]

**Supporting Information for**

**In situ laser-assisted synthesis of MoS<sub>2</sub> anchored on 3D porous graphene foam for enhanced alkaline hydrogen generation**

Ling Zhang<sup>a</sup>, Wenxiang Fu<sup>a</sup>, Jie Yang<sup>a</sup>, Junchao Yang<sup>a</sup>, Chuan Zhou<sup>a</sup>, Jiang Zhao<sup>a,\*</sup>,  
Qibin Huang<sup>a,\*</sup>

*State Key Laboratory of NBC Protection for Civilian, Beijing 102205, China*

Corresponding author. \*E-mail: 13021911723@163.com (J.Z.);  
zhanglingscdx@163.com (Q.H.)

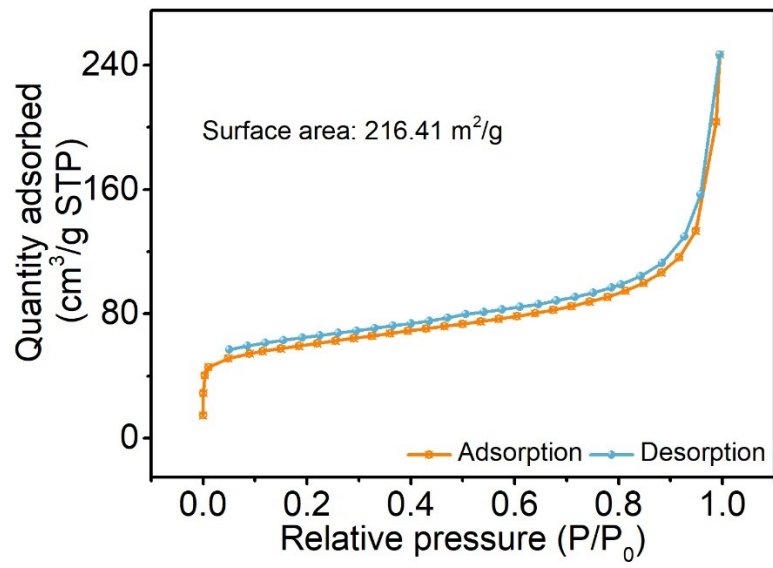

**Fig. S1.** N<sub>2</sub> adsorption-desorption isotherm of LIG/MoS<sub>2</sub>.

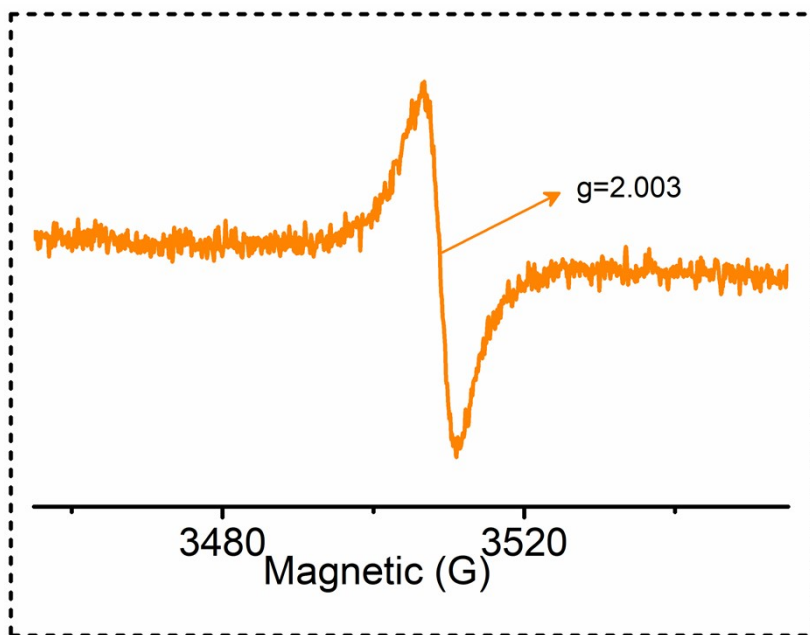

**Fig. S2.** EPR spectrum of LIG/MoS<sub>2</sub>.

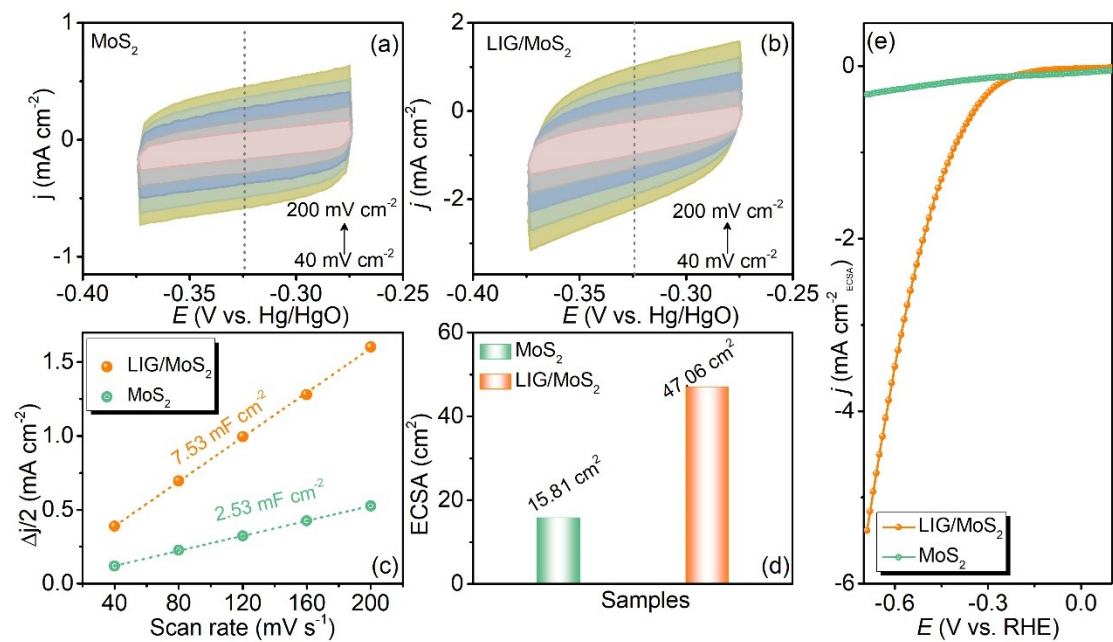

**Fig. S3.** CV curves in the potential window of -0.374~0.274 V vs. Hg/HgO for (a) commercial MoS<sub>2</sub> and (b) LIG/MoS<sub>2</sub> at various scan rates (40 to 200 mV cm<sup>-2</sup>). (c) Scan rate dependent  $\Delta j$  at -0.324 V vs. Hg/HgO for MoS<sub>2</sub> and LIG/MoS<sub>2</sub> and (d) corresponding ECSAs. (e) The ESCA-normalized polarization curves of MoS<sub>2</sub> and LIG/MoS<sub>2</sub>.

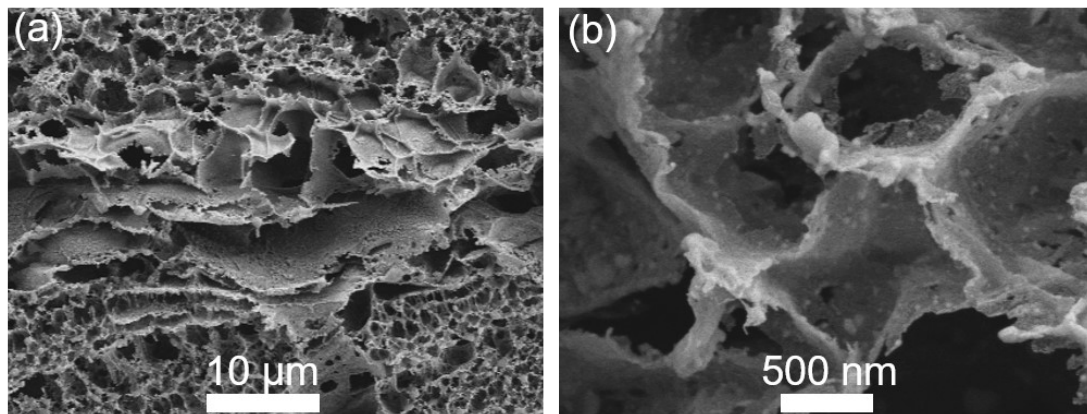

**Fig. S4.** SEM images of LIG/MoS<sub>2</sub> after long-term stability test.

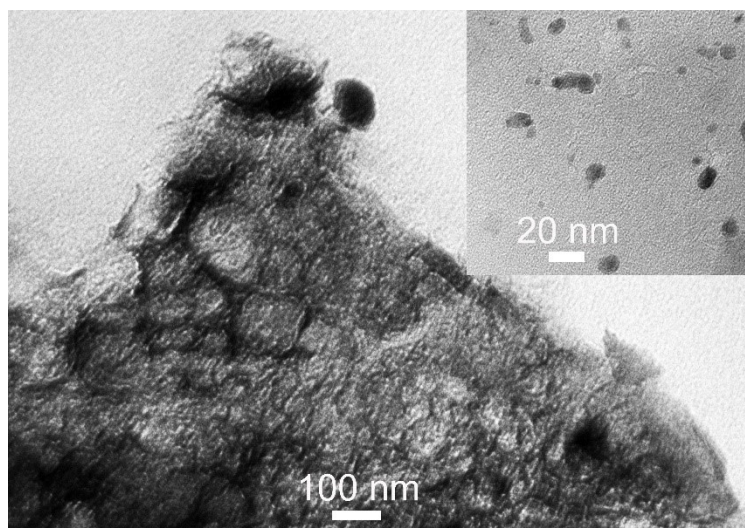

**Fig. S5.** TEM images of LIG/MoS<sub>2</sub> after long-term stability test.

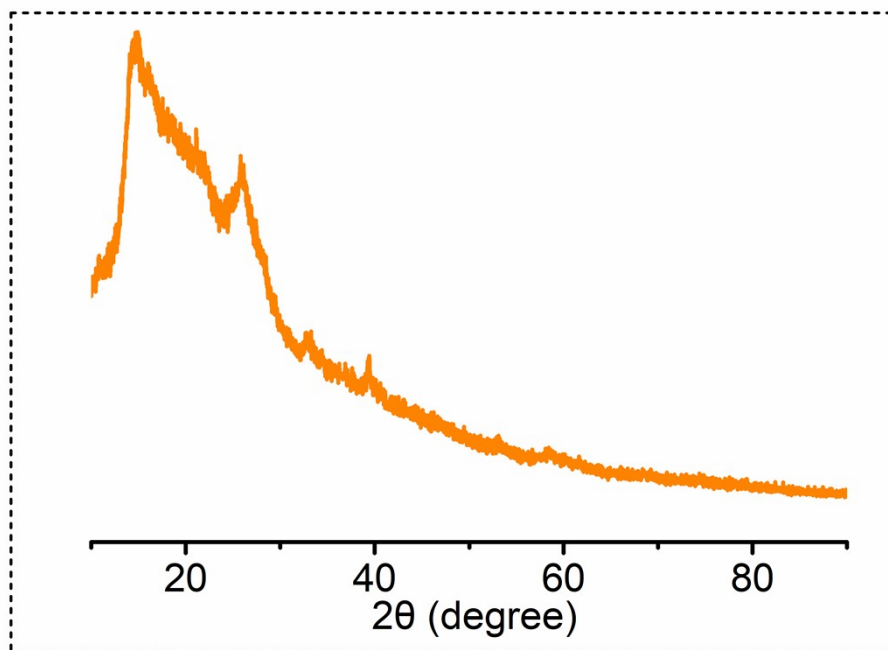

**Fig. S6.** XRD pattern of LIG/MoS<sub>2</sub> after long-term stability test.

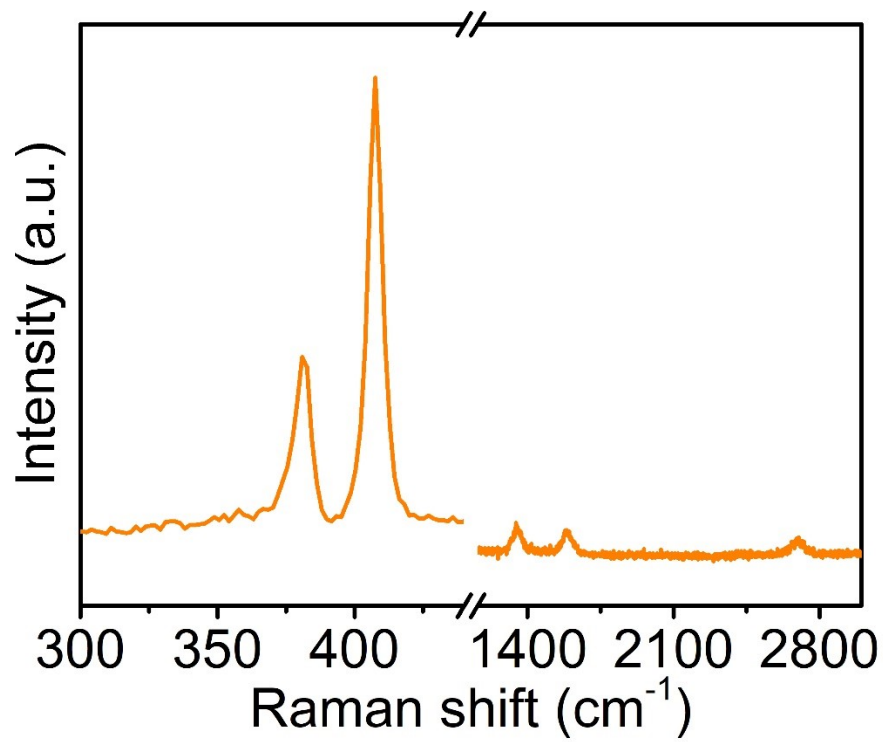

**Fig. S7.** Raman spectrum of LIG/MoS<sub>2</sub> after long-term stability test.



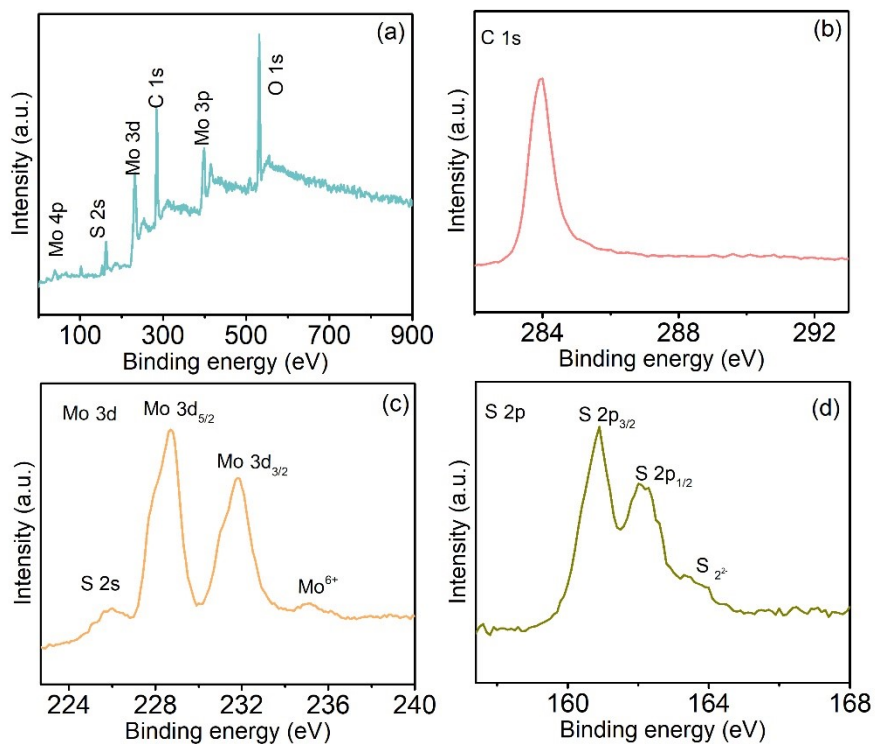

**Fig. S8.** (a) XPS survey spectrum for LIG/MoS<sub>2</sub> after long-term stability test and corresponding high-resolution XPS profiles of (b) C 1s, (c) Mo 3d and (d) S 2p.

**Table S1.** Comparison of the HER performances of LiG/MoS<sub>2</sub> with other reported MoS<sub>2</sub>/C-based HER electrocatalysts in 1.0 M KOH

| Catalyst                                                         | $\eta_{10\text{mA cm}^{-2}}$ (mV) | Ref.             |
|------------------------------------------------------------------|-----------------------------------|------------------|
| <b>LiG/MoS<sub>2</sub></b>                                       | <b>130</b>                        | <b>This work</b> |
| Ni-MoS <sub>2</sub> /rGO                                         | 168                               | [1]              |
| MoS <sub>2</sub> /rGO                                            | 225                               |                  |
| MoS <sub>2</sub> -G-NiO@Ni                                       | 150                               | [2]              |
| GQD/Co-MoS <sub>2</sub>                                          | 53                                | [3]              |
| NiMoO <sub>4</sub> -RGO                                          | 463                               | [4]              |
| NiS <sub>2</sub> /MoS <sub>2</sub> -RGO                          | 144                               |                  |
| 0.2rGO-MoS <sub>2</sub>                                          | 314                               | [5]              |
| Fe/C-doped-MoS <sub>2</sub> /Ni <sub>3</sub> S <sub>2</sub> -450 | 188                               | [6]              |
| NC@Mo <sub>2</sub> C@MoS <sub>2</sub> -(Ni)                      | 216                               | [7]              |
| DLHCs@NiS <sub>2</sub> /MoS <sub>2</sub> -8                      | 230                               | [8]              |
| 5%-Ni-MoS <sub>2</sub> /aCMT                                     | 140                               | [9]              |
| MoS <sub>2</sub> NSs/N-doped GR                                  | 208                               | [10]             |
| S-MoS <sub>2</sub> @C                                            | 155                               | [11]             |

## References

- [1] C. Lin, Z. F. Gao, J. Jin, Boosting alkaline hydrogen evolution activity with Ni-doped MoS<sub>2</sub>/reduced graphene oxide hybrid aerogel, *Chemosuschem*, 12 (2019), 457-466.
- [2] J. Yan, Y. Huang, L. Zhang, M. Zhou, P. Yang, W. Chen, X. Deng, H. Yang, J. Preparation of MoS<sub>2</sub>-Graphene-NiO@Ni foam composite by sol coating for (photo)electrocatalytic hydrogen evolution reaction, *Sol-Gel Sci. Technol.* 93 (2020), 462-470.
- [3] J. Gong, Z. Zhang, S. Xi, W. Wang, J. Lu, P. Chen, Graphene quantum dot enabled interlayer spacing and electronic structure regulation of single-atom doped MoS<sub>2</sub> for efficient alkaline hydrogen evolution, *Chem. Eng. J.* 451 (2023), 138951.
- [4] L. N. Wang, T. Guo, S. Sun, Y. Wang, X. L. Chen, K. N. Zhang, D. X. Zhang, Z. H. Xue, X. B. Zhou, Tree-like NiS<sub>2</sub>/MoS<sub>2</sub>-RGO nanocomposites as pH universal electrocatalysts for hydrogen evolution reaction, *Catal. Lett.* 149 (2019), 1197-1210.
- [5] Y. Zhang, H. Zhou, H. Wang, Y. Zhang, D. D. Dionysiou, Synergistic effect of reduced graphene oxide and near-infrared light on MoS<sub>2</sub>-mediated electrocatalytic hydrogen evolution, *Chem. Eng. J.* 418 (2021), 129343.
- [6] X. Lv, G. Liu, S. Liu, W. Chen, D. Cao, T. Song, N. Wang, Y. Zhu, Three-dimensional flower-like Fe, C-doped-MoS<sub>2</sub>/Ni<sub>3</sub>S<sub>2</sub> heterostructures spheres for accelerating electrocatalytic oxygen and hydrogen evolution, *Crystals*, 11

(2021), 340.

- [7] L. Gong, X. Mu, Q. Li, L. Ma, Y. Xiong, R. Li, Rational design of Ni-induced NC @Mo<sub>2</sub>C@MoS<sub>2</sub> sphere electrocatalyst for efficient hydrogen evolution reaction in acidic and alkaline media, *Int. J. Hydrogen Energy*, 46 (2021), 5250-5258.
- [8] X. Luan, K. Zhu, C. Wang, W. Shi, A. Szymaska, K. Matras-Postolek, P. Yang, NiS<sub>2</sub>/MoS<sub>2</sub> hetero-nanosheets grown on double-layered hollow carbon nanospheres for enhanced hydrogen evolution reaction, *Adv. Mater. Interfaces*, 9 (2022), 2201661.
- [9] Y. Xue, X. Bai, Y. Xu, Q. Yan, M. Zhu, K. Zhu, K. Ye, J. Yan, D. Cao, G. Wang, Vertically oriented Ni-Doped MoS<sub>2</sub> nanosheets supported on hollow carbon microtubes for enhanced hydrogen evolution reaction and water splitting, *Compos. B. Eng.* 224 (2021), 109229.
- [10] D. M. Nguyen, P. D. H. Anh, L. G. Bach, Q. B. Bui, Hierarchical heterostructure based on molybdenum dichalcogenide nanosheets assembled nitrogen doped graphene layers for efficient hydrogen evolution reaction, *Mater. Res. Bull.* 115 (2019), 201-210.
- [11] Q. C. Xu, Y. Liu, H. Jiang, Y. J. Hu, H. L. Liu, C. Li, Unsaturated sulfur edge engineering of strongly coupled MoS<sub>2</sub> nanosheet-carbon macroporous hybrid catalyst for enhanced hydrogen generation, *Adv. Energy Mater.* 9 (2019), 1802553.
